# Supplementary material for: Parents’ and carers’ impression of “quality” within a Paediatric Emergency Department
Source: Springer Nature journal article supplement (doi:10.1186/s12887-021-02752-7), 2021-07-13
Supplement: MOESM1 [file 19357142]

# Parents' and Carers' Impression of “Quality” within a Paediatric Emergency Department

---

## Supporting Information

**Table A General ED Quality Assurance parameters**

|                                                                                                                                                                                                                                                                                                                                                                                                                                                                                                                                                                                                                                                                                                                                                                                                                                                                                                                                                                                                                                                                                                      |
|------------------------------------------------------------------------------------------------------------------------------------------------------------------------------------------------------------------------------------------------------------------------------------------------------------------------------------------------------------------------------------------------------------------------------------------------------------------------------------------------------------------------------------------------------------------------------------------------------------------------------------------------------------------------------------------------------------------------------------------------------------------------------------------------------------------------------------------------------------------------------------------------------------------------------------------------------------------------------------------------------------------------------------------------------------------------------------------------------|
| <p><b>Workload</b></p> <p><i>Workload General</i></p> <ul style="list-style-type: none"><li>• Number of Presentations</li><li>• Number of patients who Did not wait (DNW) for treatment</li><li>• Number of Admissions</li></ul> <p><i>Workload Acuity</i></p> <ul style="list-style-type: none"><li>• Number &amp; percentage Triage Category 1 / 2 / 3 / 4 / 5</li><li>• Median time in resuscitation Area Triage Category 1&amp;2</li></ul> <p><i>Workload Timely Disposition</i></p> <ul style="list-style-type: none"><li>• Number &amp; percentage of presentation seen in &lt;4hrs</li><li>• Median time to disposition</li><li>• Triage Category 1 / 2 / 3 / 4 / 5<ul style="list-style-type: none"><li>○ Presentations seen in &lt;4hrs</li><li>○ Median time to be seen</li><li>○ Median time to disposition</li></ul></li></ul> <p><i>Workload Capacity</i></p> <ul style="list-style-type: none"><li>• Number of staff (nursing / physician/ allied health)</li><li>• Number of beds open (ED &amp; ED Observation)</li><li>• Median length of stay ( ED &amp; ED Observation)</li></ul> |
| <p><b>Patient Centred</b></p> <ul style="list-style-type: none"><li>• Percentage of patients who leave without been seen</li><li>• Customer feedback “Excellent/Very Good /Good”</li><li>• Discharge summary completed within 48hrs</li></ul>                                                                                                                                                                                                                                                                                                                                                                                                                                                                                                                                                                                                                                                                                                                                                                                                                                                        |

- Median time to complete Discharge summary
- Time to be seen
- Time to initial Treatment, including analgesia
- Complaints

**Safety**

- Number of medication errors
- Handover related errors
- Treatment or investigation errors
- Child protection screening

**Effectiveness & Efficiency**

- Time to analgesia
- Representation to ED in 48hrs (excluding scheduled reviews)
- Representation to ED in 48hrs requiring admission (excluding scheduled reviews)

**Table B Disease Specific Quality Assurance measures**

| <b>Quality Assurance Measure – Disease specific</b>                                                                                                                                                                                                                                                                                                                                                                                                                                                                                                                                                                                                                                                                                     |
|-----------------------------------------------------------------------------------------------------------------------------------------------------------------------------------------------------------------------------------------------------------------------------------------------------------------------------------------------------------------------------------------------------------------------------------------------------------------------------------------------------------------------------------------------------------------------------------------------------------------------------------------------------------------------------------------------------------------------------------------|
| <p>Asthma</p> <ul style="list-style-type: none"><li>• Time to reliever treatment (<math>\beta_2</math> agonist/Ipratropium)</li><li>• Time to steroids (&gt;5yrs &amp; Moderate/Severe/Critical)</li><li>• % Patients received steroids</li><li>• % Patients received respiratory assessments/grading</li><li>• % Patients received second line agent</li><li>• % Patients received Ipratropium</li><li>• % Patients received Aminophylline / Magnesium Sulphate</li><li>• Discharged with Action plan &amp; Education</li><li>• Discharged with steroids</li><li>• Discharged with Preventer</li><li>• Discharged with follow-up</li><li>• Steroids given in &lt;5yrs and mild asthma</li><li>• Chest x-rays in acute asthma</li></ul> |
| <p>Bronchiolitis</p> <ul style="list-style-type: none"><li>• Total number of bronchiolitis presentations</li><li>• Dispositions admission/home/scheduled review/representations &lt;48hrs</li><li>• Number of chest x-rays</li></ul>                                                                                                                                                                                                                                                                                                                                                                                                                                                                                                    |
| <p>Neonatal Sepsis / Meningitis</p> <ul style="list-style-type: none"><li>• Time to antibiotic administration</li><li>• Time to investigations</li><li>• Time to disposition</li></ul> <p>Severe Sepsis / Shock</p> <ul style="list-style-type: none"><li>• Time to IV/IO access</li><li>• Time to antibiotics administration</li><li>• Median time to fluid bolus</li><li>• % of patients requiring bolus given within 1hrs</li><li>• % of patients with refractory shock requiring inotrope</li></ul>                                                                                                                                                                                                                                 |

|                                                                                                                                                                                                                                                                                                                                                                                                                                                             |
|-------------------------------------------------------------------------------------------------------------------------------------------------------------------------------------------------------------------------------------------------------------------------------------------------------------------------------------------------------------------------------------------------------------------------------------------------------------|
| <ul style="list-style-type: none"> <li>• % of patients Initial blood glucose in 1 hr</li> </ul>                                                                                                                                                                                                                                                                                                                                                             |
| <p>Oncological Febrile Neutropenia</p> <ul style="list-style-type: none"> <li>• Time to investigations (FBE)</li> <li>• Time to Antibiotics</li> <li>• Time to disposition</li> </ul>                                                                                                                                                                                                                                                                       |
| <p>Severe Head Injury</p> <ul style="list-style-type: none"> <li>• % of Patients without spinal precaution</li> <li>• % Patients with untreated hypotension</li> <li>• % Patients receiving neuro observations including BP</li> <li>• Median time to imaging from request</li> <li>• Median time to neurosurgeon response from request</li> <li>• % Needing definitive airway management</li> <li>• Median time to definitive airway management</li> </ul> |
| <p>Status Epilepticus</p> <ul style="list-style-type: none"> <li>• Time from arrival &amp; % of patients who received benzodiazepine</li> <li>• Time from arrival to second line anti-epileptics</li> <li>• % Patient &amp; Time to check initial blood glucose</li> <li>• % patient failure to achieve seizure control within 30mins</li> </ul>                                                                                                            |
| <p>Diabetes Ketoacidosis (DKA)</p> <ul style="list-style-type: none"> <li>• % Patient received IV Normal saline</li> <li>• % Patient received appropriate insulin dose &amp; route</li> <li>• % patient received potassium replacement</li> <li>• % patient received IV insulin</li> <li>• % patient received bicarbonate</li> </ul>                                                                                                                        |
| <p>Anaphylaxis</p> <ul style="list-style-type: none"> <li>• % patients received adrenaline</li> <li>• % patient received adrenaline by appropriate route</li> </ul>                                                                                                                                                                                                                                                                                         |
| <p>Fractures Triage category 1 / 2 / 3</p> <p>Time to Analgesia in ED (include analgesia via Ambulance service)</p>                                                                                                                                                                                                                                                                                                                                         |

Table C Analysis of participant's impression of "Quality"

| Commentary on best care/quality                                                                                   | No of responses | Percentage of Total (%) | Survey Two                                        |                                                        | Survey Three                                      |                                                        |
|-------------------------------------------------------------------------------------------------------------------|-----------------|-------------------------|---------------------------------------------------|--------------------------------------------------------|---------------------------------------------------|--------------------------------------------------------|
|                                                                                                                   |                 |                         | % Likert Score<br>Very Important<br>(Score 7 - 9) | % Likert Score<br>Extremely Important<br>(Score 8 - 9) | % Likert Score<br>Very Important<br>(Score 7 - 9) | % Likert Score<br>Extremely Important<br>(Score 8 - 9) |
| Kind, caring and empathic staff who are friendly, courteous and compassionate                                     | 69              | 13.1%                   | 94.2%                                             | 61.0%                                                  | 89.3%                                             | 51.2%                                                  |
| • Caring & loving                                                                                                 | 18              | 3.4%                    |                                                   |                                                        |                                                   |                                                        |
| • Friendly                                                                                                        | 17              | 3.2%                    |                                                   |                                                        |                                                   |                                                        |
| • Kind                                                                                                            | 10              | 1.9%                    |                                                   |                                                        |                                                   |                                                        |
| • Understanding                                                                                                   | 6               | 1.1%                    |                                                   |                                                        |                                                   |                                                        |
| • Patient                                                                                                         | 5               | 1.0%                    |                                                   |                                                        |                                                   |                                                        |
| • Compassionate                                                                                                   | 5               | 1.0%                    |                                                   |                                                        |                                                   |                                                        |
| • Empathy                                                                                                         | 4               | 0.8%                    |                                                   |                                                        |                                                   |                                                        |
| • Supportive                                                                                                      | 4               | 0.8%                    |                                                   |                                                        |                                                   |                                                        |
| Timely management of children (assessment, diagnosis and treatment)                                               | 60              | 11.4%                   | 95.0%                                             | 61.0%                                                  | 96.5%                                             | 57.8%                                                  |
| Thorough and optimum medical assessment                                                                           | 56              | 10.6%                   | 97.1%                                             | 80.7%                                                  | 98.7%                                             | 84.3%                                                  |
| Staff should listen to and understand parents and have exceptional communication skills                           | 45              | 8.6%                    | 94.2%                                             | 51.0%                                                  | 93.2%                                             | 55.4%                                                  |
| Staff should provide feedback & updates to carers/parents on the progress of care (investigations and treatments) | 44              | 8.4%                    | 97.1%                                             | 63.2%                                                  | 98.7%                                             | 54.5%                                                  |
| Spacious / uncrowded environment waiting area and ED                                                              | 42              | 8.0%                    | 87.0%                                             | 45.4%                                                  | 76.7%                                             | 35.4%                                                  |
| Explaining medical conditions, results and plans should be done in simple terms                                   | 39              | 7.4%                    | 94.2%                                             | 54.3%                                                  | 93.0%                                             | 53.5%                                                  |
| Experienced and knowledgeable staff                                                                               | 31              | 5.9%                    | 97.1%                                             | 76.5%                                                  | 100%                                              | 77.3%                                                  |
| Shorter wait times                                                                                                | 29              | 5.5%                    | 74.3%                                             | 33.3%                                                  | 68.2%                                             | 32.1%                                                  |
| Tailored child friendly environment – waiting area and ED                                                         | 25              | 4.8%                    | 87.0%                                             | 49.3%                                                  | 81.4%                                             | 42.1%                                                  |
| Clear follow up plans and reviews that are communicated and scheduled (Including ED, GP and Outpatients)          | 23              | 4.4%                    | 99.5%                                             | 60.3%                                                  | 95.4%                                             | 72.1%                                                  |
| Triage assessment should be performed in a timely manner                                                          | 22              | 4.2%                    | 100%                                              | 65.2%                                                  | 95.4%                                             | 63.2%                                                  |
| Resources and equipment availability                                                                              | 20              | 3.8%                    | 94.2%                                             | 73.2%                                                  | 88.4%                                             | 72.1%                                                  |
| All staff behaving in a calm and professional manner that communicates to and supports each other                 | 20              | 3.8%                    | 97.1%                                             | 78.3%                                                  | 91.0%                                             | 66.9%                                                  |
| More medical & nursing staff in the Emergency department to treat patients                                        | 18              | 3.4%                    | 78.3%                                             | 55.1%                                                  | 86.4%                                             | 52.3%                                                  |
| Timely review of patient to assess progress                                                                       | 15              | 2.9%                    | 87.0%                                             | 58.0%                                                  | 84.4%                                             | 49.8%                                                  |
| Provide an estimate on wait time and any updates while waiting                                                    | 14              | 2.7%                    | 78.3%                                             | 44.5%                                                  | 75.0%                                             | 32.1%                                                  |
| Clean & hygienic environment / waiting area                                                                       | 13              | 2.5%                    | 87.0%                                             | 45.4%                                                  | 76.7%                                             | 35.4%                                                  |

|                                                                                                    |    |      |                  |                  |                   |                  |
|----------------------------------------------------------------------------------------------------|----|------|------------------|------------------|-------------------|------------------|
| Timely access to sub specialised if needed                                                         | 11 | 2.1% | <del>96.7%</del> | <del>61.0%</del> | <del>93.0%</del>  | <del>61.0%</del> |
| Specialised nurses and doctors for children                                                        | 11 | 2.1% | <del>97.4%</del> | <del>75.4%</del> | <del>100.0%</del> | <del>77.3%</del> |
| Review and check children while they are waiting                                                   | 8  | 1.5% | <del>89.0%</del> | <del>62.3%</del> | <del>93.2%</del>  | <del>61.4%</del> |
| Treating the sicker kids first                                                                     | 6  | 1.1% | <del>97.4%</del> | <del>80.7%</del> | <del>100.0%</del> | <del>79.1%</del> |
| Triage to provide initial care such as pain relief                                                 | 5  | 1.0% | 100%             | <del>65.2%</del> | <del>95.4%</del>  | <del>63.2%</del> |
| Minimal bureaucracy, repetition and administration                                                 | 5  | 1.0% | <del>41.0%</del> | <del>20.3%</del> | <del>XX</del>     | <del>XX</del>    |
| Transfer of patients to other areas of hospital to happen quickly, smoothly and without repetition | 5  | 1.0% | <del>87.0%</del> | <del>33.7%</del> | <del>86.0%</del>  | <del>47.5%</del> |
| Communicate and update parents when there is a change in staff                                     | 3  | 0.6% | <del>78.9%</del> | <del>41.2%</del> | <del>72.1%</del>  | <del>44.2%</del> |
| Medical Treatment followed                                                                         | 3  | 0.6% | <del>87.0%</del> | <del>57.5%</del> | <del>89.6%</del>  | <del>61.4%</del> |
| Space for visitors in waiting area and treatment area                                              | 3  | 0.6% | <del>87.0%</del> | <del>49.3%</del> | <del>81.4%</del>  | <del>42.9%</del> |
| Engage parents/carer in the care of the child                                                      | 3  | 0.6% | <del>94.2%</del> | <del>61.0%</del> | <del>91.0%</del>  | <del>52.3%</del> |
| Retain experienced and skilled paediatric staff                                                    | 2  | 0.4% | <del>99.6%</del> | <del>78.3%</del> | <del>98.7%</del>  | <del>68.5%</del> |
| No medical or nursing students                                                                     | 1  | 0.2% |                  |                  |                   |                  |
| Parking spaces that are available and reasonably priced                                            | 1  | 0.2% |                  |                  |                   |                  |
| Mobile reception in ED                                                                             | 1  | 0.2% |                  |                  |                   |                  |
| Ease of access to complete medical records                                                         | 1  | 0.2% |                  |                  |                   |                  |
| Doing everything possible                                                                          | 1  | 0.2% |                  |                  |                   |                  |
| Staff that skilled in non-English (Mandarin)                                                       | 1  | 0.2% |                  |                  |                   |                  |
| Evidence based                                                                                     | 1  | 0.2% |                  |                  |                   |                  |
| Name of staff easily seen                                                                          | 1  | 0.2% |                  |                  |                   |                  |
| Outcomes/Safety/Stabilise *                                                                        | 1  | 0.2% |                  |                  |                   |                  |
| Dedicated space for Autistic kids                                                                  | 1  | 0.2% |                  |                  |                   |                  |
| * One word comments where context can't be determined                                              |    |      |                  |                  |                   |                  |
